# Supplementary material
Source: PubMed Central journal article supplement (PMC4004778)
Supplement: me-13-1335.pdf [file me-13-1335.pdf]

1 **SUPPLEMENTAL LEGENDS**

2 **Supplemental Table S1.** EC<sub>50</sub>'s with 95% confidence intervals. All experiments include S.E.M for at  
3 least 3 replicates. Also included in the table is the change in the EC<sub>50</sub>'s observed between T<sub>3</sub> versus T<sub>4</sub>.

4  
5 **Supplemental Figure S1.** Representative EC<sub>50</sub>s/affinities graphed with 95% confidence intervals for  
6 protease protection affinity of TR isoforms with T<sub>3</sub> and T<sub>4</sub> (as in Figure 1).

7  
8 **Supplemental Figure S2. Representative raw electrophoretic mobility supershift data for TRα1 and**  
9 **TRβ1 with (A) DR4:TRAP220, (B) DR4:SRC1, or (C)DIV6:NcoRω.** Assay was conducted as  
10 described as in Figure 8. FP = free probe; coA or coR = addition of coregulator indicated.

11  
12 **Supplemental Figure S3. T<sub>4</sub> regulates endogenous gene expression.** GH3 cells stably transformed with  
13 TRα1 (64) were placed in DMEM:F12 (1:1) and 5% Hormone-Stripped FBS for 24 hours containing the  
14 indicated concentrations of T<sub>3</sub> or T<sub>4</sub>. RNA was then isolated using Trizol-chloroform extraction and a  
15 cDNA library was prepared using Qiagen Quantitect-RT from 1μg of RNA per reaction. qrtPCR was then  
16 conducted using a Roche Lightcycler 480 SYBR green MasterMix and a Roche Lightcycler 480 with  
17 primers (5'-CTTCGAGTGACTGAGGGCTG and 5'-CCACGGAGTTCTCTGCTTTCA) and (5'-  
18 CACCGAATCTGGGTCGAGTC and 5'-CCGTTACCTGTATGCACTC ) to determine the expression  
19 levels of Sonic Hedge Hog (SHH) and Kruppel-Like Factor 9 (KLF9); expression of each was normalized  
20 against the housekeeping gene 60S ribosomal protein L8 (RLP8). The mean and standard errors (n=3) are  
21 shown.

# Protease Protection

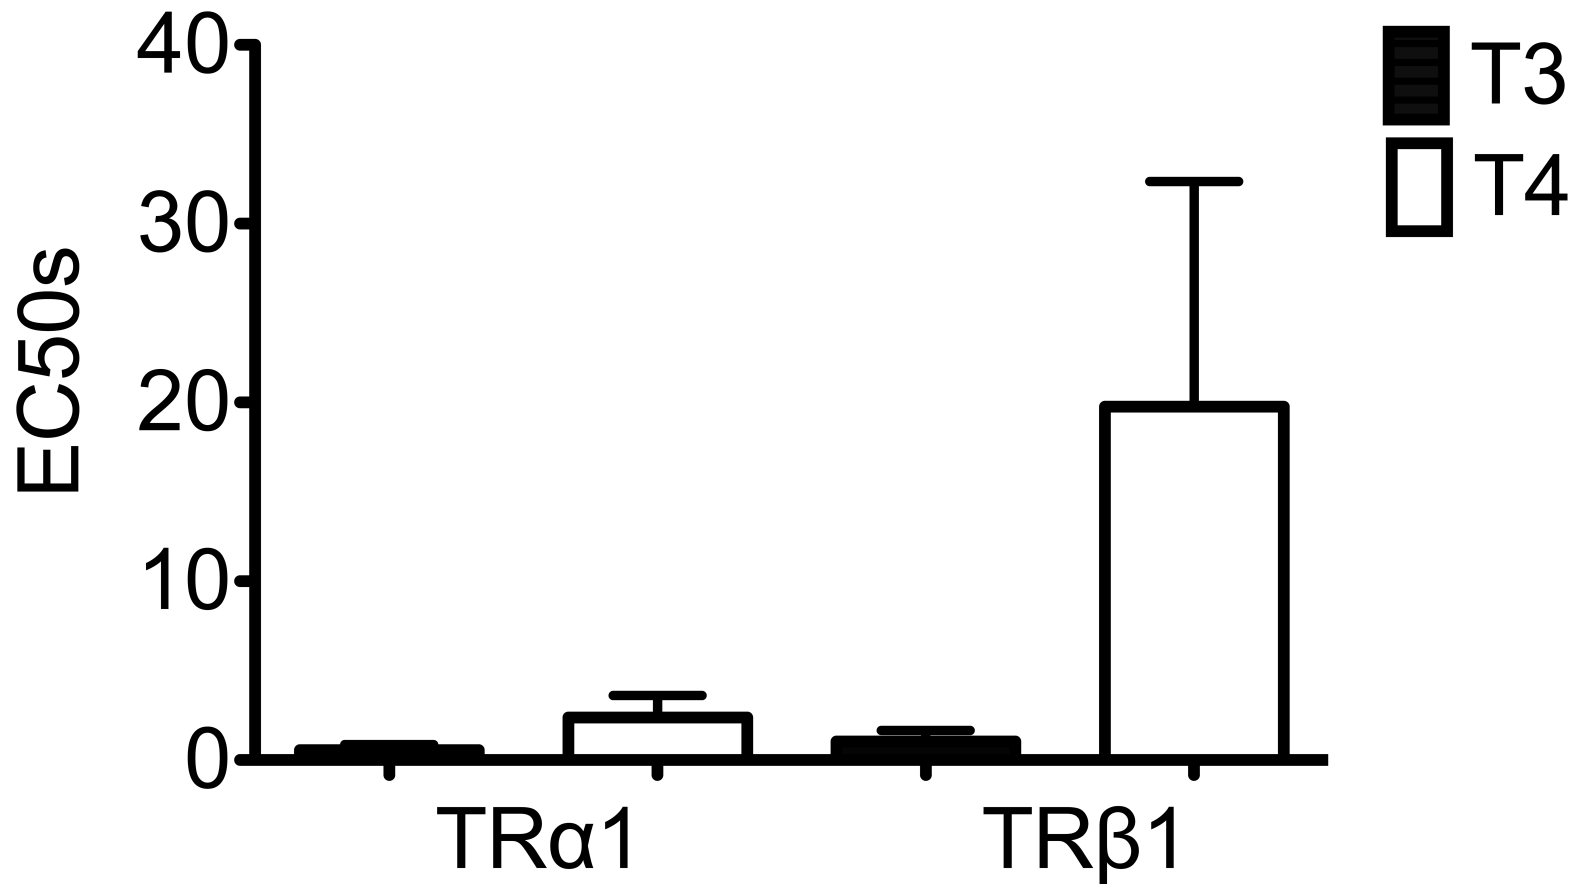

A.  
DR4:TRAP220:TR $\alpha$ I

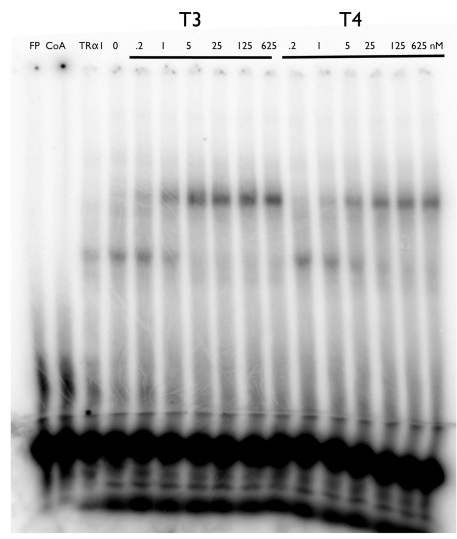

DR4:TRAP220:TR $\beta$ I

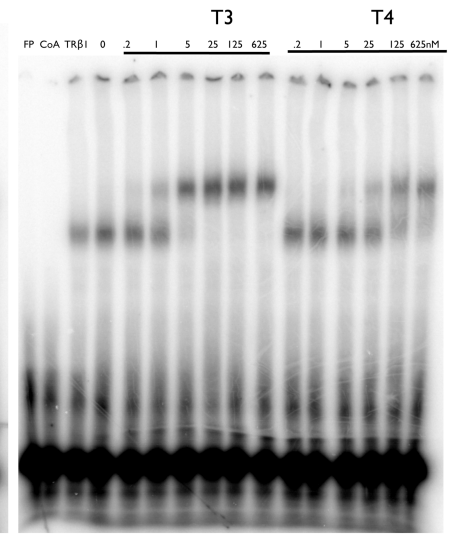

B.  
DR4:SRC1:TR $\alpha$ I

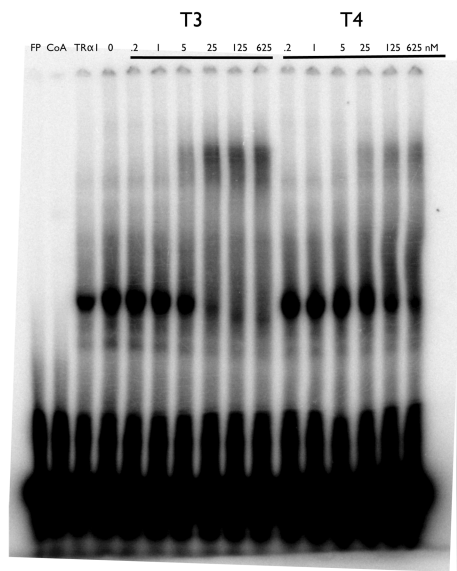

DR4:SRC1:TR $\beta$ I

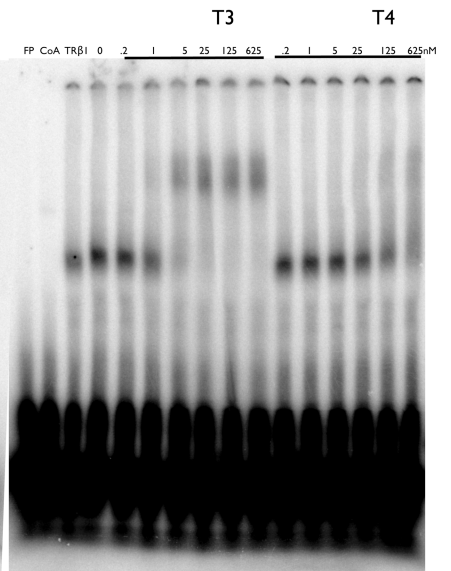

C.  
DIV6:NCoR $\omega$ :TR $\alpha$ I

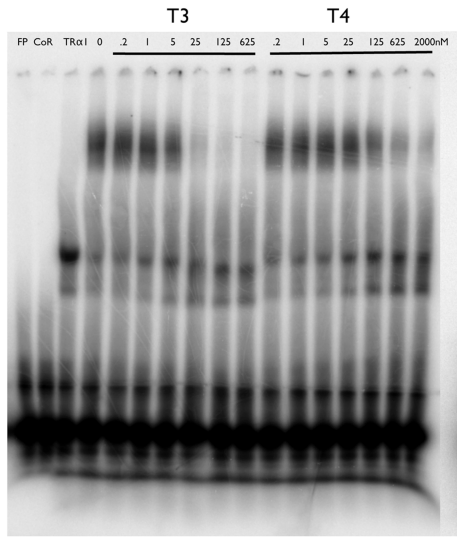

DIV6:NCoR $\omega$ :TR $\beta$ I

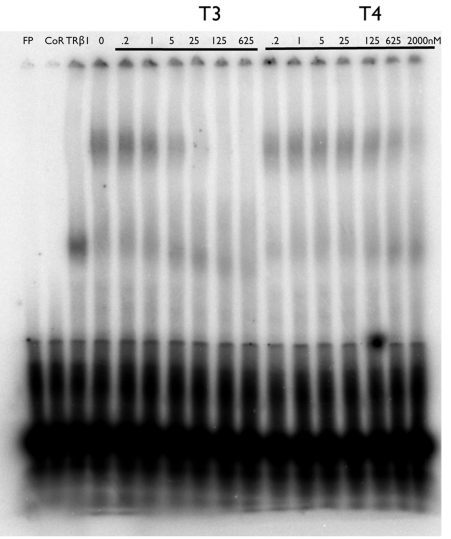

Supplemental Figure 2

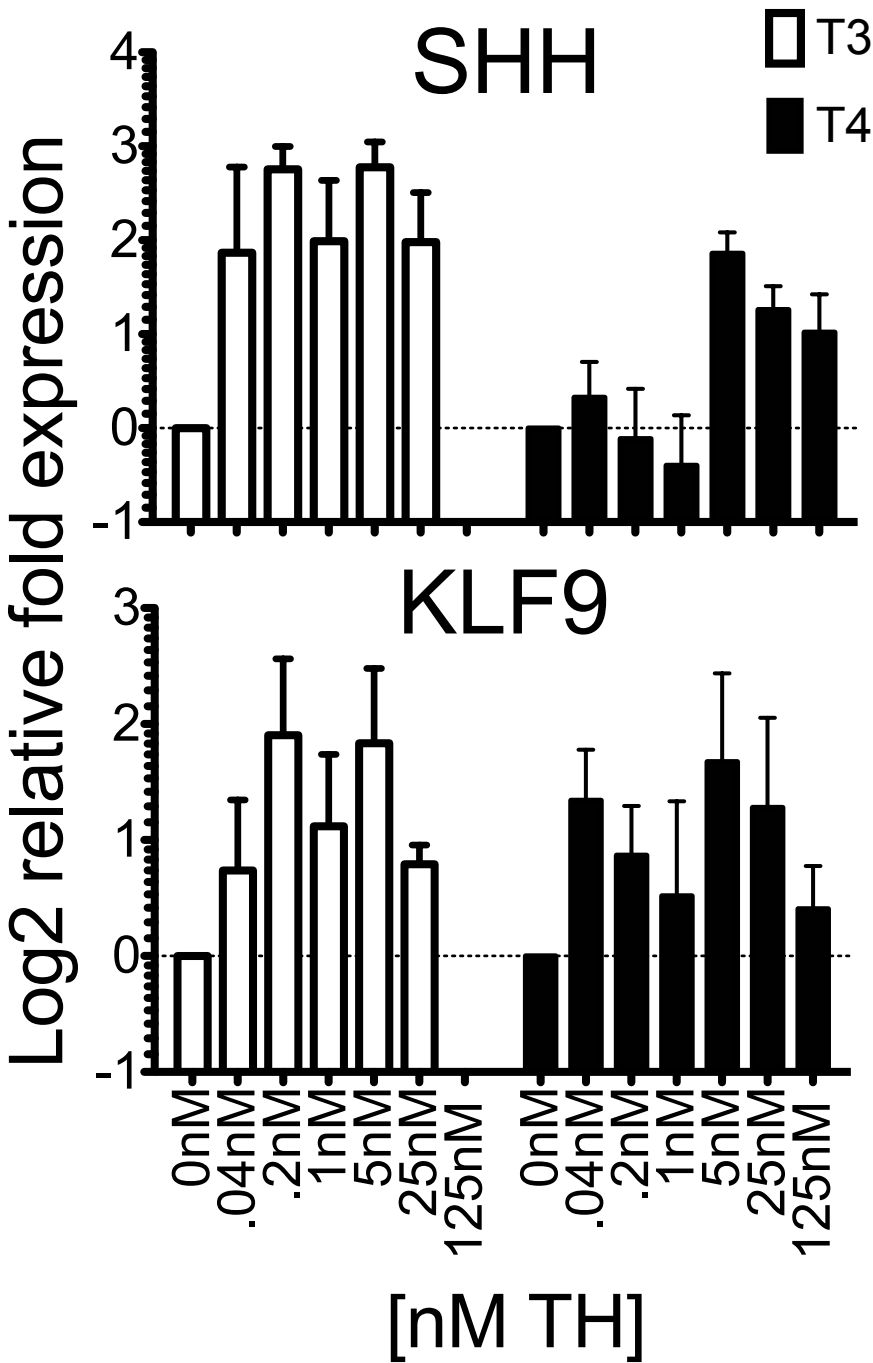

**Figure 1.**

| Elastase                         |        | [nM T3]          | [nM T4]        | Fold change |
|----------------------------------|--------|------------------|----------------|-------------|
| <b>A. TR<math>\alpha</math>1</b> | EC50   | 0.5              | 2.4            | 4.4         |
|                                  | 95% CI | 0.3083 to 0.9333 | 1.228 to 4.608 |             |
| <b>B. TR<math>\beta</math>1</b>  | EC50   | 1.0              | 19.8           | 19.0        |
|                                  | 95% CI | 0.6160 to 1.757  | 12.61 to 30.97 |             |

**Figure 3.**

| DR4-CON-tk-luciferase |        | [nM T3]           | [nM T4]        | Fold change |
|-----------------------|--------|-------------------|----------------|-------------|
| TR $\alpha$ 1         | EC50   | 0.3               | 21.2           | 77.6        |
| CV1                   | 95% CI | 0.1378 to 0.8202  | 8.441 to 44.66 |             |
| TR $\beta$ 1          | EC50   | 1.2               | 49.0           | 40.6        |
| CV1                   | 95% CI | 0.7470 to 1.950   | 30.38 to 78.90 |             |
| TR $\alpha$ 1         | EC50   | 0.2               | 10.3           | 52.9        |
| HEK                   | 95% CI | 0.04587 to 0.4232 | 2.632 to 16.65 |             |
| TR $\beta$ 1          | EC50   | 0.6               | 19.1           | 33.1        |
| HEK                   | 95% CI | 0.2783 to 1.191   | 9.437 to 38.47 |             |
| TR $\alpha$ 1         | EC50   | 0.1               | 18.4           | 125.4       |
| HepG2                 | 95% CI | 0.07420 to 0.2913 | 11.48 to 29.57 |             |
| TR $\beta$ 1          | EC50   | 0.3               | 21.7           | 78.7        |
| HepG2                 | 95% CI | 0.1529 to 0.4982  | 11.20 to 42.13 |             |

**Figure 4.**

| DR4-CON-tk-luciferase |        | [nM T3]         | [nM T4]        | Fold change |
|-----------------------|--------|-----------------|----------------|-------------|
| TR $\alpha$ 1         | EC50   | 1.8             | 38.5           | 21.7        |
| 3T3L1                 | 95% CI | 0.9171 to 3.426 | 19.31 to 76.65 |             |
| TR $\beta$ 1          | EC50   | 4.2             | 471.5          | 112.4       |
| 3T3L1                 | 95% CI | 2.177 to 8.081  | 213.8 to 1040  |             |
| TR $\alpha$ 1         | EC50   | 1.9             | 33.0           | 17.8        |
| HeLa                  | 95% CI | 0.8546 to 4.008 | 19.16 to 56.79 |             |
| TR $\beta$ 1          | EC50   | 2.6             | 99.1           | 38.1        |
| HeLa                  | 95% CI | 1.246 to 5.424  | 55.82 to 175.9 |             |
| TR $\alpha$ 1         | EC50   | 3.4             | 37.1           | 10.9        |
| CHO                   | 95% CI | 2.106 to 5.519  | 23.81 to 57.77 |             |
| TR $\beta$ 1          | EC50   | 6.2             | 135.2          | 21.8        |
| CHO                   | 95% CI | 2.857 to 13.49  | 64.42 to 283.8 |             |

**Figure 5.**

| <b>A. CHO cell transfections</b> |        | [nM T3]           | [nM T4]        | Fold change |
|----------------------------------|--------|-------------------|----------------|-------------|
| TR $\alpha$ 1                    | EC50   | 5.8               | 48.5           | 8.4         |
| DR4-M-tk-luciferase              | 95% CI | 3.363 to 9.952    | 38.61 to 60.96 |             |
| TR $\beta$ 1                     | EC50   | 13.0              | 117.8          | 9.0         |
| DR4-M-tk-luciferase              | 95% CI | 8.542 to 19.91    | 71.27 to 194.8 |             |
| TR $\alpha$ 1                    | EC50   | 2.9               | 38.0           | 12.9        |
| DR4- $\alpha$ MHC-tk-luciferase  | 95% CI | 2.021 to 4.294    | 25.39 to 56.99 |             |
| TR $\beta$ 1                     | EC50   | 3.5               | 108.1          | 31.2        |
| DR4- $\alpha$ MHC-tk-luciferase  | 95% CI | 1.850 to 6.481    | 45.66 to 256.1 |             |
| TR $\alpha$ 1                    | EC50   | 4.9               | 51.4           | 10.5        |
| DR4-F2-tk-luciferase             | 95% CI | 3.190 to 7.512    | 32.78 to 80.66 |             |
| TR $\beta$ 1                     | EC50   | 14.0              | 164.7          | 11.8        |
| DR4-F2-tk-luciferase             | 95% CI | 8.700 to 22.41    | 93.26 to 290.8 |             |
| <b>B. HEK cell transfections</b> |        | [nM T3]           | [nM T4]        | Fold change |
| TR $\alpha$ 1                    | EC50   | 0.1               | 5.3            | 74.9        |
| DR4-M-tk-luciferase              | 95% CI | 0.02840 to 0.1744 | 2.655 to 10.47 |             |
| TR $\beta$ 1                     | EC50   | 0.3               | 34.8           | 116.1       |
| DR4-M-tk-luciferase              | 95% CI | 0.1041 to 0.8638  | 22.69 to 53.41 |             |

**Figure 6.**

| <b>Coactivator Pulldowns</b> |        | [nM T3]        | [nM T4]        | Fold change |
|------------------------------|--------|----------------|----------------|-------------|
| TR $\alpha$ 1                | EC50   | 12.2           | 24.8           | 2.0         |
| SRC1                         | 95% CI | 9.569 to 15.52 | 19.31 to 31.89 |             |
| TR $\beta$ 1                 | EC50   | 41.8           | 187.6          | 4.5         |
| SRC1                         |        | 34.06 to 51.30 | 143.1 to 245.9 |             |
| TR $\alpha$ 1                | EC50   | 14.0           | 9.9            | 0.7         |
| TRAP                         | 95% CI | 10.44 to 18.88 | 7.330 to 13.48 |             |
| TR $\beta$ 1                 | EC50   | 49.5           | 135.6          | 2.7         |
| TRAP                         | 95% CI | 40.41 to 60.67 | 102.2 to 180.1 |             |
| TR $\alpha$ 1                | EC50   | 23.8           | 91.3           | 3.8         |
| CBP                          | 95% CI | 16.35 to 34.54 | 58.02 to 143.7 |             |
| TR $\beta$ 1                 | EC50   | 103.4          | 284.5          | 2.8         |
| CBP                          | 95% CI | 75.24 to 142.0 | 165.2 to 489.8 |             |
| TR $\alpha$ 1                | EC50   | 10.6           | 61.2           | 5.8         |
| GRIP                         | 95% CI | 8.546 to 13.25 | 44.50 to 84.19 |             |

|              |        |                |                |      |
|--------------|--------|----------------|----------------|------|
| TRβ1         | EC50   | 43.2           | 384.6          | 8.9  |
| GRIP         | 95% CI | 35.68 to 52.28 | 303.8 to 486.9 |      |
| TRα1         | EC50   | 8.1            | 42.0           | 5.2  |
| GRIP reverse | 95% CI | 5.914 to 11.00 | 30.94 to 56.87 |      |
| TRβ1         | EC50   | 53.1           | 1013.0         | 19.1 |
| GRIP reverse | 95% CI | 37.54 to 75.14 | 853.9 to 1202  |      |

**Figure 7.**

| <b>Mammalian-2-hybrid</b> |        | [nM T3]  | [nM T4]    | Fold change |
|---------------------------|--------|----------|------------|-------------|
| CV-1 cells                | EC50   | 1.3      | 12.0       | 9.2         |
| TRα1-SRC1                 | 95% CI | 0.7-2.1  | 7.2-19.9   |             |
| CHO cells                 | EC50   | 9.5      | 71.4       | 7.5         |
| TRα1-SRC1                 | 95% CI | 6.5-14.0 | 44.0-115.8 |             |

**Figure 8.**

| <b>coactivator EMSAs:</b> |        | [nM T3]         | [nM T4]        | Fold change |
|---------------------------|--------|-----------------|----------------|-------------|
| TRα1                      | EC50   | 5.0             | 32.9           | 6.6         |
| SRC DR4                   | 95% CI | 2.918 to 8.593  | 18.63 to 58.18 |             |
| TRβ1                      | EC50   | 2.7             | 95.6           | 35.1        |
| SRC DR4                   | 95% CI | 1.859 to 3.985  | 52.62 to 173.5 |             |
| TRα1                      | EC50   | 4.8             | 21.3           | 4.5         |
| SRC DIV6                  | 95% CI | 3.316 to 6.817  | 13.52 to 33.40 |             |
| TRβ1                      | EC50   | 2.0             | 61.0           | 30.8        |
| SRC DIV6                  | 95% CI | 1.497 to 2.618  | 31.02 to 120.0 |             |
| TRα1                      | EC50   | 1.7             | 8.4            | 4.8         |
| TRAP DR4                  | 95% CI | 0.9057 to 3.313 | 3.912 to 17.96 |             |
| TRβ1                      | EC50   | 3.1             | 66.9           | 21.7        |
| TRAP DR4                  | 95% CI | 2.018 to 4.715  | 43.18 to 103.6 |             |
| TRα1                      | EC50   | 1.9             | 4.0            | 2.2         |
| TRAP DIV6                 | 95% CI | 1.287 to 2.679  | 2.926 to 5.500 |             |
| TRβ1                      | EC50   | 1.4             | 24.9           | 18.0        |
| TRAP DIV6                 | 95% CI | 0.9944 to 1.937 | 12.62 to 49.23 |             |
| TRα1/RXRα                 | EC50   | 1.5             | 3.6            | 2.4         |
| TRAP DIV6                 | 95% CI | 1.020 to 2.260  | 2.361 to 5.568 |             |
| TRβ1/RXRα                 | EC50   | 0.6             | 9.2            | 15.1        |
| TRAP DIV6                 | 95% CI | 0.3539 to 1.036 | 3.521 to 23.79 |             |

**Figure 9.**

| <b>Corepressor Pulldown</b>       |        | [nM T3]        | [nM T4]        | Fold change |
|-----------------------------------|--------|----------------|----------------|-------------|
| TR alpha                          | EC50   | 5.8            | 432.0          | 74.3        |
| NcoR $\omega$                     | 95% CI | 3.690 to 9.159 | 232.7 to 802.0 |             |
| TR $\beta$ 1                      | EC50   | 20.6           | 389.4          | 18.9        |
| NcoR $\omega$ DIV6                | 95% CI | 11.96 to 35.36 | 189.9 to 798.5 |             |
| <b>Corepressor EMSAs</b>          |        | [nM T3]        | [nM T4]        | Fold change |
| TR $\alpha$ 1                     | EC50   | 7.8            | 208.3          | 26.7        |
| NcoR $\omega$ DIV6                | 95% CI | 1.929 to 7.931 | 11.25 to 55.03 |             |
| TR $\beta$ 1                      | EC50   | 6.4            | 659.5          | 103.1       |
| NcoR $\omega$ DIV6                | 95% CI | 3.859 to 10.60 | 143.0 to 3042  |             |
| <b>Copressor Mammalian-2-hybr</b> |        | [nM T3]        | [nM T4]        | Fold change |
| CHO cells                         | EC50   | 9.0            | 86.2           | 9.6         |
| TR $\alpha$ 1-NCoR $\omega$       | 95% CI | 4.1-19.5       | 5.2-1436       |             |
| CV-1 cells                        | EC50   | 1.0            | 41.7           | 41.7        |
| TR $\alpha$ 1-NCoR $\omega$       | 95% CI | 0.7-1.5        | 15.8-110.2     |             |
